# Supplementary material for: Stress Effects on Temperature-Dependent In-Plane Raman Modes of Supported Monolayer Graphene Induced by Thermal Annealing
Source: MDPI journal article supplement (doi:10.3390/nano11102751), 2021-10-17
Supplement: s1 [file s1]

# Stress Effects on Temperature-Dependent in-Plane Raman Modes of Supported Monolayer Graphene Induced by Thermal Annealing

Yuehua Wei <sup>1</sup>, Zhenhua Wei <sup>2</sup>, Xiaoming Zheng <sup>3</sup>, Jinxin Liu <sup>3</sup>, Yangbo Chen <sup>3</sup>, Yue Su <sup>3</sup>, Wei Luo <sup>2</sup>, Gang Peng <sup>2</sup>, Han Huang <sup>4</sup>, Weiwei Cai <sup>3</sup>, Chuyun Deng <sup>2,\*</sup>, Xueao Zhang <sup>3,\*</sup> and Shiqiao Qin <sup>1,\*</sup>

<sup>1</sup> College of Advanced Interdisciplinary Studies, National University of Defense Technology, Changsha 410073, China; 15116271019@163.com

<sup>2</sup> College of Arts and Sciences, National University of Defense Technology, Changsha 410073, China; weizhsx@139.com (Z.W.); luoweihust@163.com (W.L.); 13507480737@126.com (G.P.)

<sup>3</sup> College of Physical Science and Technology, Xiamen University, Xiamen 361005, China; zhengxiaoming2020@xmu.edu.cn (Xiaoming Zheng); jxliu@stu.xmu.edu.cn (J.L.); bobby-chen@stu.xmu.edu.cn (Y.C.); suyuelnu@163.com (Y.S.); wwcai@xmu.edu.cn (W.C.)

<sup>4</sup> Hunan Key Laboratory of Super-microstructure and Ultrafast Process, School of Physics and Electronics, Central South University, Changsha 410083, China; physhh@csu.edu.cn

\* Correspondence: dengchuyun@nudt.edu.cn (C.D.); xazhang@xmu.edu.cn (Xueao Zhang); sqqin8@nudt.edu.cn (S.Q.)

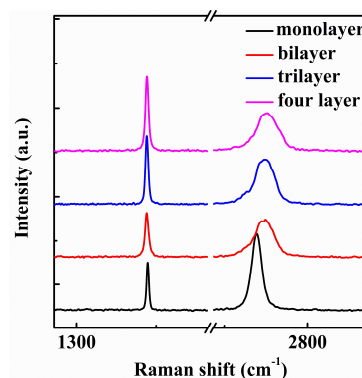

**Figure S1.** The Raman spectra of different layer graphene.

**Table S1.** the full width at half maximum (FWHM) of 2D band for different layer graphene.

| Graphene layer | The FWHM of 2D band (cm <sup>-1</sup> ) |
|----------------|-----------------------------------------|
| monolayer      | ~30                                     |
| bilayer        | ~54                                     |
| trilayer       | ~59                                     |
| four layer     | ~61                                     |

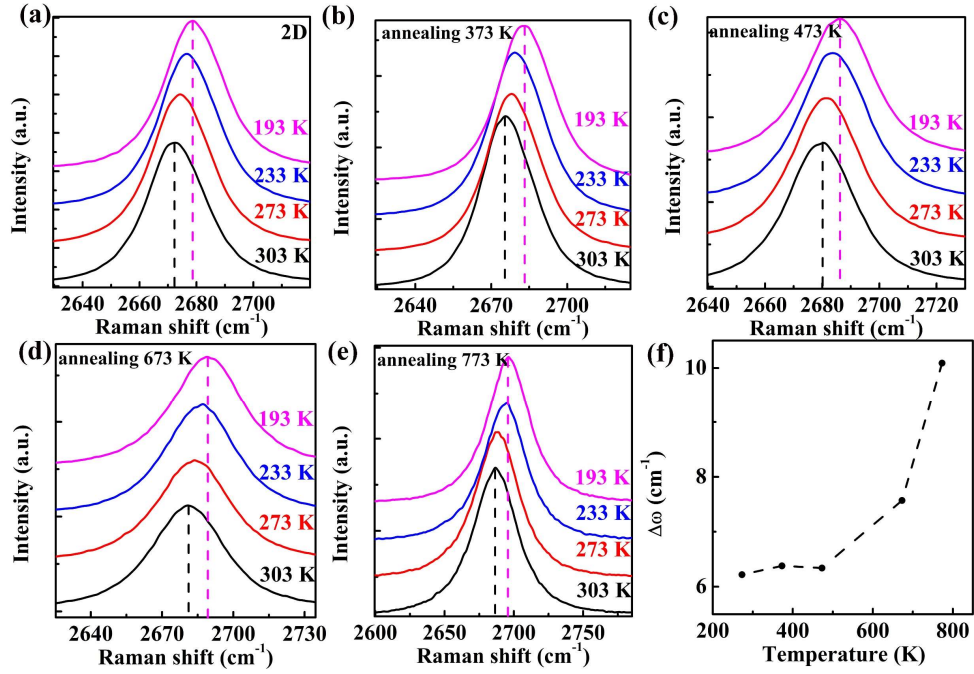

**Figure S2.** The temperature-dependent Raman spectra of 2D band for supported monolayer graphene flakes with various thermal annealing processes. (a) Pristine; (b) Annealing at 373 K; (c) Annealing at 473 K; (d) Annealing at 673 K; (e) Annealing at 773 K; (f) The evolution of Raman peak redshift for 2D band as a function of thermal annealing temperature.

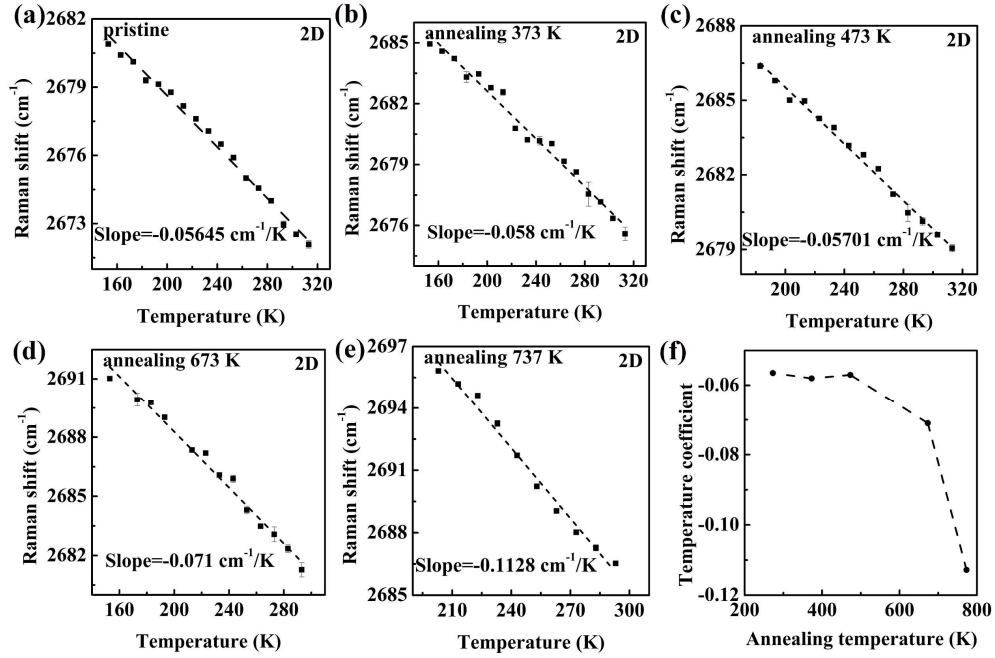

**Figure S3.** The temperature coefficients of 2D band for supported monolayer graphene flakes with various thermal annealing processes. (a) Pristine; (b) Annealing at 373 K; (c) Annealing at 473 K; (d) Annealing at 673 K; (e) Annealing at 773 K; (f) The extracted temperature coefficients of monolayer graphene under different annealing temperatures.

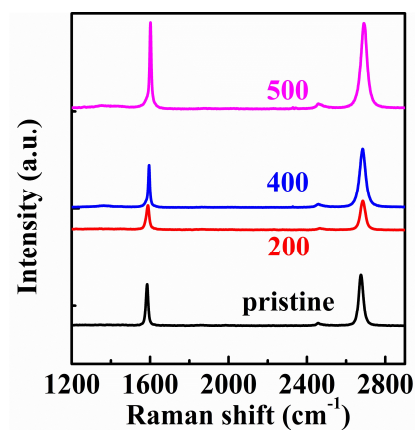

**Figure S4.** The Raman spectra of supported monolayer graphene with various thermal annealing process.

**Table S2.** The summary of Raman peak shift.

| Thermal annealing temperature (K) | G band peak shift (cm <sup>-1</sup> ) | 2D band peak shift (cm <sup>-1</sup> ) |
|-----------------------------------|---------------------------------------|----------------------------------------|
| 373                               | 0.45                                  | 5.1                                    |
| 473                               | 6.13                                  | 8.66                                   |
| 673                               | 9.11                                  | 8.72                                   |
| 773                               | 15.09                                 | 15.06                                  |

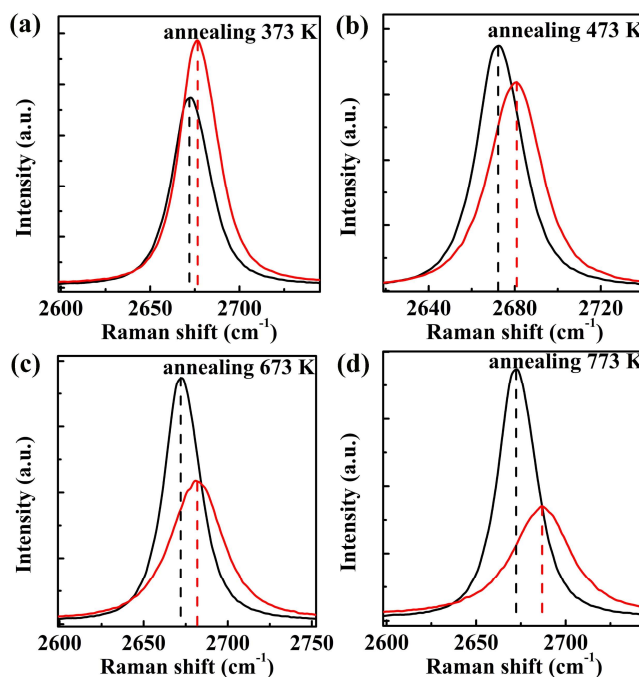

**Figure S5.** The Raman spectra of supported monolayer graphene after thermal annealing at different temperatures. (a–d) The Raman spectra annealing at 373 K, 473 K, 673 K, 773 K.

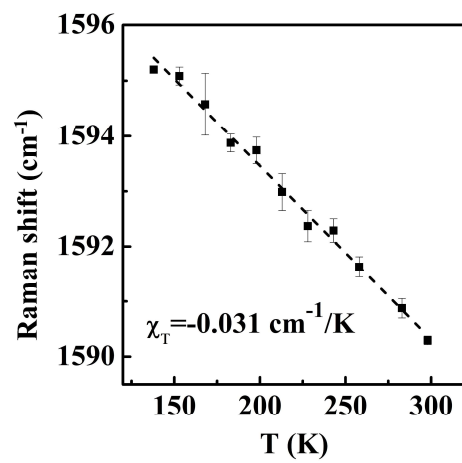

**Figure S6.** The temperature-dependent Raman spectra of monolayer graphene on BN.
